# Supplementary material for: Mastering fundamentals of supramolecular design with carboxylic acids. Common lessons from X-ray crystallography and scanning tunneling microscopy
Source: Royal Society of Chemistry journal article supplement (doi:10.1039/c0cs00022a), 2010-09-29
Supplement: c0cs00022a.pdf [file c0cs00022a.pdf]

## Supporting Information

for the paper

### Mastering fundamentals of supramolecular design with carboxylic acids

by Oleksandr Ivasenko and Dmitrii F. Perepichka

#### Full References to Discussed Crystal Structures

- 1:** LEZJAB01, L. R. MacGillivray and M. J. Zaworotko, *J.Chem.Cryst.*, 1994, **24**, 703.  
**p-aminobenzoic acid / 4-hydroxysulfonyl-2-hydroxybenzoic acid:** FETWIL, G. Smith, U. D. Wermuth and J. M. White, *Acta Crystallogr., Sect. E: Struct. Rep. Online*, 2005, **61**, o313.
- 2•3:** UKOKIO, M. Gdaniec, W. Jankowski, M. J. Milewska and T. Polonski, *Angew. Chem., Int. Ed.*, 2003, **42**, 3903.
- 2•4:** UKOKOU, M. Gdaniec, W. Jankowski, M. J. Milewska and T. Polonski, *Angew. Chem., Int. Ed.*, 2003, **42**, 3903.
- 2-methylbenzoic acid / 2-chlorobenzoic acid:** TOJFUU, M. Polito, E. D'Oria, L. Maini, P. G. Karamertzanis, F. Grepioni, D. Braga and S. Price, *CrystEngComm*, 2008, **10**, 1848.
- 4-fluorobenzoic acid / benzoic acid:** SATHOK (73% / 27%), SATJAY(44% / 56%), N. Yamamoto, T. Taga and K. Machida, *Acta Crystallogr., Sect. B: Struct. Sci.*, 1989, **45**, 162.
- 5:** COXYLC, I. Goldberg, *Acta Crystallogr., Sect. B: Struct. Crystallogr. Cryst. Chem.*, 1981, **37**, 102.
- 6:** RIXKIS, D. D. LeCloux and S. J. Lippard, *Inorg. Chem.*, 1997, **36**, 4035.
- 7:** PIMELA07, C. A. Mitchell, Lian Yu and M. D. Ward, *J. Am. Chem. Soc.*, 2001, **123**, 10830.
- 8:** SUBRAC05, V. R. Thalladi, M. Nüsse and R. Boese, *J. Am. Chem. Soc.*, 2000, **122**, 9227.
- 9:** AZELAC05, V. R. Thalladi, M. Nüsse and R. Boese, *J. Am. Chem. Soc.*, 2000, **122**, 9227.
- 10:** AVOZIU, A. T. ten Cate, H. Kooijman, A. L. Spek, R. P. Sijbesma and E. W. Meijer, *J. Am. Chem. Soc.*, 2004, **126**, 3801.
- 11:** AVOZUG, A. T. ten Cate, H. Kooijman, A. L. Spek, R. P. Sijbesma and E. W. Meijer, *J. Am. Chem. Soc.*, 2004, **126**, 3801.
- 12:** AVOZOA, A. T. ten Cate, H. Kooijman, A. L. Spek, R. P. Sijbesma and E. W. Meijer, *J. Am. Chem. Soc.*, 2004, **126**, 3801.
- 13 / potassium picrate:** EDOQAP, Y. Miyake, A. Hosoda, M. Takagaki, E. Nomura and H. Taniguchi, *Chem. Commun.*, 2002, 132.
- 14:** WISJAJ, L. J. Fitzgerald and R. E. Gerkin, *Acta Crystallogr., Sect. C: Cryst. Struct. Commun.*, 1996, **52**, 1838.
- 15:** KOFJUK, L. J. Fitzgerald, J. C. Gallucci and R. E. Gerkin, *Acta Crystallogr., Sect. B: Struct. Sci.*, 1991, **47**, 776.
- 16:** PHTHAC02, O. Ermer, *Helv. Chim. Acta*, 1981, **64**, 1902.
- 17:** BENZDC01, J. L. Derissen, *Acta Crystallogr., Sect. B: Struct. Crystallogr. Cryst. Chem.*, 1974, **30**, 2764.
- 19:** FURDCA, E. Martuscelli and C. Pedone, *Acta Crystallogr., Sect. B: Struct. Crystallogr. Cryst. Chem.*, 1968, **24**, 175.
- 21:** SAZQEP, R. E. Gerkin, *Acta Crystallogr., Sect. C: Cryst. Struct. Commun.*, 1998, **54**, 1887.
- 22:** PEQBIW, R. E. Gerkin, *Acta Crystallogr., Sect. C: Cryst. Struct. Commun.*, 1998, **54**, 1369.

- 23:** EGIRAN, J.E.Field, M. Y .Combariza, R. W. Vachet and D. Venkataraman, *Chem. Commun.*, 2002, 2260.
- 25<sub>2</sub>26<sub>4</sub>:** AJUSED, B. T. Ibragimov, K. M. Beketov and E. Weber, *J. Supramol. Chem.*, 2002, **2**, 353
- 27<sub>4</sub>28<sub>2</sub>:** OGAWUO, S. L. Childs and K. S. Hagen, *CrystEngComm*, 2002, **4**, 265.
- Phenylene-1,3-diacetic acid:** HOFBOU, M. Zhu, *Acta Crystallogr., Sect. E: Struct. Rep. Online*, 2008, **64**, o1719.
- 28:** DEVCOW03, S. L. Childs and K. S. Hagen, *CrystEngComm*, 2002, **4**, 265.
- 29:** FINMEU, E. G. Popova, L. A. Chetkina, V. K. Bel'skii, A. M. Andrievskii, A. N. Poplovskii and K. M. Dyumaev, *Zh. Strukt. Khim. (Russ.) (J. Struct. Chem.)*, 1987, **28**, 129.
- 30:** SEFYEH, E. G. Popova, L. A. Chetkina, A. N. Sobolev, V. K. Belk'skii, A. M. Andrievskii, A. N. Poplavskii and K. M. Dyumaev, *Dokl.Akad.Nauk SSSR(Russ.)(Proc.Nat.Acad.Sci.USSR)*, 1989, **304**, 127.
- 31:** NISMEH, E. J. Valente, J. F. Fuller and J. D. Ball, *Acta Crystallogr., Sect. B: Struct. Sci.*, 1998, **54**, 162.
- 33:** RENCUI, L. J. Fitzgerald and R. E. Gerkin, *Acta Crystallogr., Sect. C: Cryst. Struct. Commun.*, 1997, **53**, 967.
- 27<sub>1</sub>34<sub>2</sub>:** LERSAD, P. Vishweshwar, D. A. Beauchamp and M. J. Zaworotko, *Cryst. Growth Des.*, 2006, **6**, 2429.
- 35:** JUKROW, C.Barrio, S.Garcia-Granda, F.Gomez-Beltran, *Acta Crystallogr., Sect. C: Cryst. Struct. Commun.*, 1993, **49**, 253.
- 36:** CALHIH, D. Volkmer, M. Fricke, C. Agena and J. Mattay, *CrystEngComm*, 2002, **4**, 288.
- 34:** BTCOAC, D. J. Duchamp and R. E. Marsh, *Acta Crystallogr., Sect. B: Struct. Crystallogr. Cryst. Chem.*, 1969, **25**, 5.
- 1,2,3-benzenetricarboxylic acid:** TANRIK, F. Guo and K. D. M. Harris, *J. Am. Chem. Soc.*, 2005, **127**, 7314.
- 45:** JOQKEF, P. Holy, J. Zavada, I. Cisarova and J. Podlaha, *Angew. Chem., Int. Ed.*, 1999, **38**, 381.
- 46:** MELLIT, S. F. Darlow, *Acta Crystallogr.*, 1961, **14**, 159.
- 47:** DOCLIQ, K. Kobayashi, T. Shirasaka, E. Horn and N. Furukawa, *Tetrahedron Lett.*, 2000, **41**, 89.
- 48:** GESTAZ, O. Ermer and A. Eling, *Angew. Chem., Int. Ed.*, 1988, **27**, 829.
- 49:** GEJVEW, O.Ermer, *J. Am. Chem. Soc.*, 1988, **110**, 3747
- 1,2,4-benzenetricarboxylic acid:** TRIMEL, F. Takusagawa, K. Hirotsu and A. Shimada, *Bull. Chem. Soc. Jpn.*, 1973, **46**, 2960.
- 50:** CXEGEO, Z.-X. Xie, S.-Z. Hu, Z.-H. Chen, S.-A. Li, W.-P. Shi, *Acta Crystallogr., Sect. C: Cryst. Struct. Commun.*, 1993, **49**, 1154.
